# Supplementary material for: Desulfurization of diesel oil by selective oxidation and extraction of sulfur compounds by ionic liquids—a contribution to a competitive process design
Source: Royal Society of Chemistry journal article supplement (doi:10.1039/b918724c), 2010-01-01
Supplement: b918724c.pdf [file b918724c.pdf]

### Electronic Supplementary Information:

Table 1: Gaschromatographical method to determine sulphur compounds in diesel oils

|              |                       |                 |             |
|--------------|-----------------------|-----------------|-------------|
| Device:      | Varian CP 3800 / PFPD | Column:         | CP-Sil 8 CB |
| Detector:    | PFPD                  | Length:         | 25 m        |
| Split:       | variabel (20 - 60)    | Inner Diameter: | 0,32 mm     |
| Carrier Gas: | H <sub>2</sub>        | Film Thickness: | 0,52 µm     |
| Injector:    | 200 °C                |                 |             |

Temperature Program:

1 min 50 °C isotherm, ramp 10 K/min to 220 °C, 5 min 220 °C isotherm

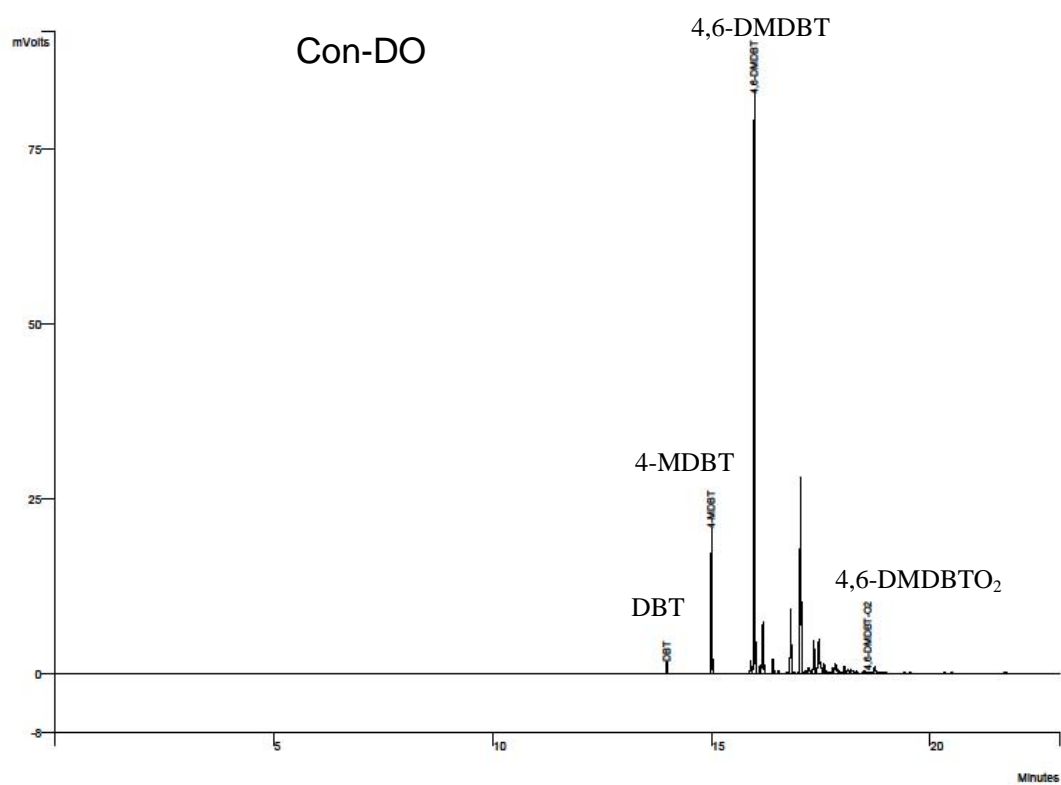

Fig. 1: Gaschromatogramm of Con-DO

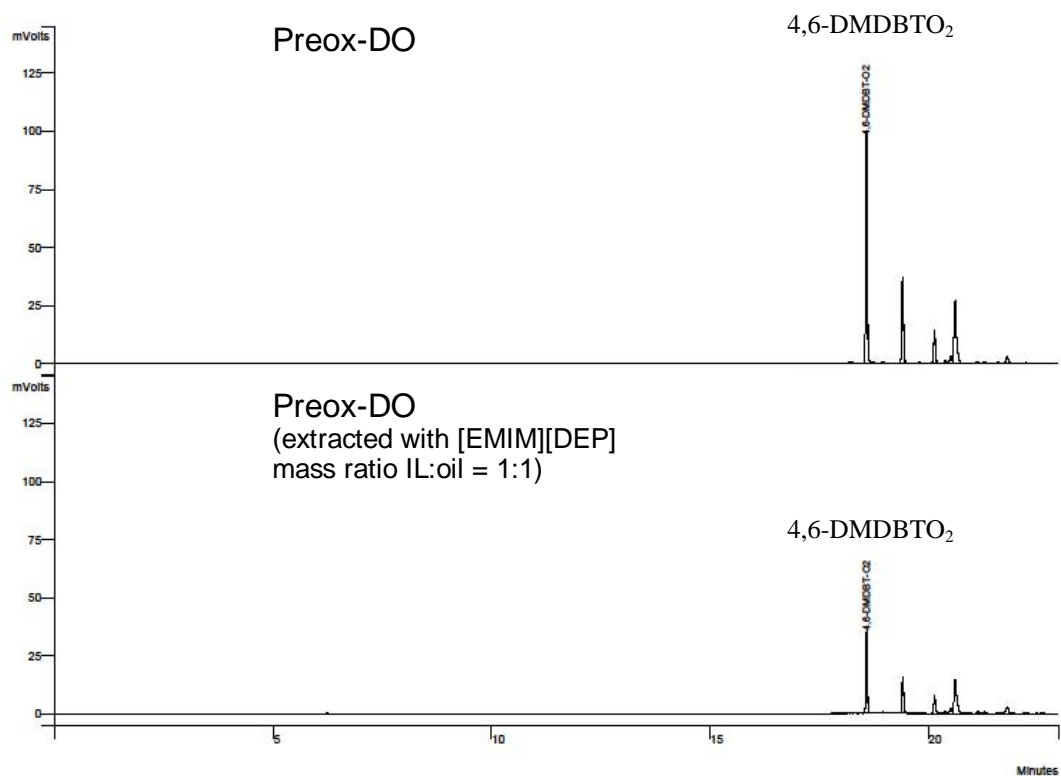

Fig. 2: Gaschromatogramm of Preox-DO and Preox-DO, extracted with [EMIM][DEP] (conditions: mass ratio IL:oil = 1:1, 25°C, 15 min)
